# Supplementary material
Source: MDPI journal article supplement (https://www.mdpi.com/2073-4352/13/8/1257)
Supplement: s1 [file s1]

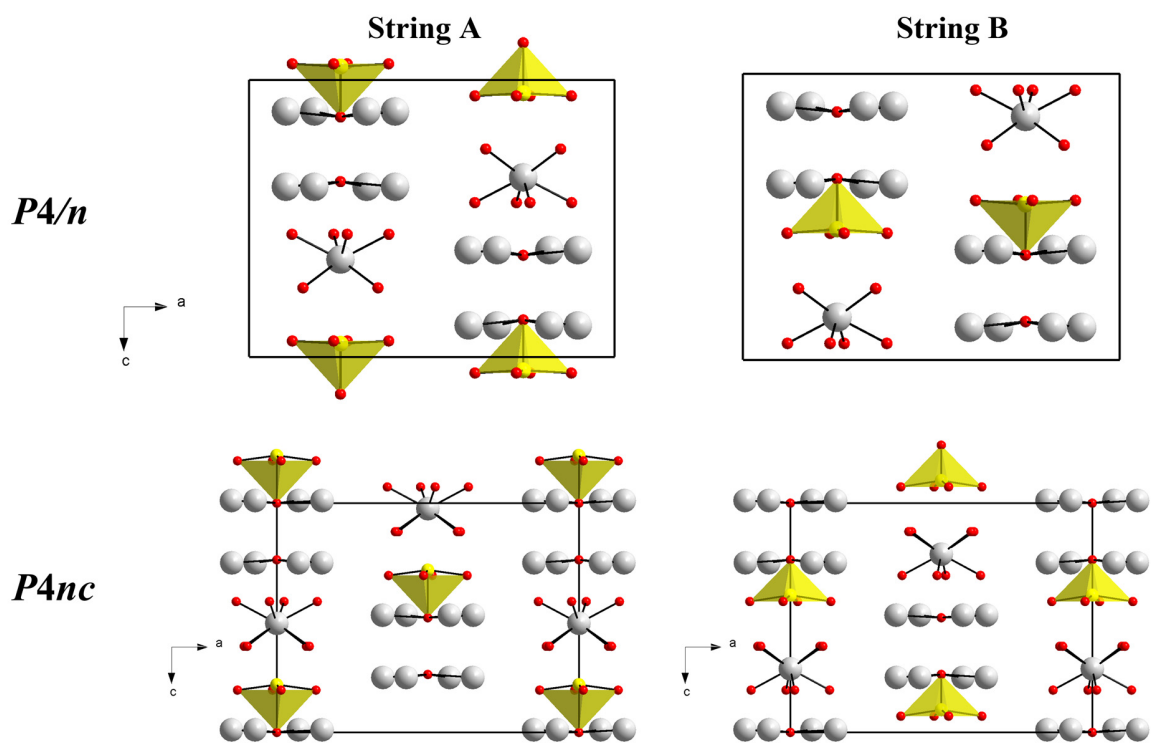

**Figure S1.** Depiction of the String A and String B arrangements in space groups  $P4/n$  and  $P4nc$ . The strings propagate along the fourfold axes at  $x = 1/4, y = 1/4, z$  and  $x = 3/4, y = 3/4, z$  in  $P4/n$ , and at the origin at  $x = 0, y = 0, z$  and  $x = 1/2, y = 1/2, z$  in  $P4nc$ .

### **Additional details of test refinements of I and II for space group evaluation:**

The first test refinements were performed in  $P4nc$ , where the atoms of String A and String B were identified and separated into two domains using the PART command in SHELX. For Compound **I**, free refinement of the string occupancies resulted in 61.8% and 38.2%, which is close to even distribution. The final R1 converged on 3.81% with a Flack parameter of 0.54(11), an indicator of either an inversion twin or a center of symmetry being present. The PLATON software suggested increasing to space group  $P4/nnc$ , and no twin law was identified. An inversion twin was applied with 53.7% as the majority domain contribution. This did not significantly improve the R1 value. With everything accounted for, the solution still had 7 nonpositive definite (NPD) atoms in  $P4nc$  (compared to zero NPD atoms in  $P4/nnc$ ). The higher R values and poorer displacement parameters in  $P4nc$  suggest such an assignment incorrect for **I**. The same analysis was performed with **II**, which had 56% and 44% string occupancies and a resulting R1 of 5.12%. With the Flack parameter of 0.477(28), PLATON was used once more, which found no twin law and again suggested  $P4/nnc$  higher symmetry. The applied inversion twin had almost 50% distribution for each domain, but there remained 33 NPD atoms in this solution. For both compounds,  $P4nc$  was insufficient to model the diffraction data.

The second test refinements were performed in space group  $P4/n$ , with the same method used to identify the string atoms and determine the string occupancies. For Compound **I**, the string occupancies refined to 61.2% and 38.8% respectively, similar to refinement in  $P4nc$ ; the final R1 converged on 4.44%. The  $F_o^2$  values were significantly higher than the  $F_c^2$  values, which are an indicator of incorrect space group or that a twin domain is not accounted for. PLATON did not find any applicable twin law that may bring the  $F^2$  values into better agreement, and suggested increasing symmetry to  $P4/nnc$ . There were no remaining NPD atoms, but the discrepancy in the

$F_o^2$  and  $F_c^2$  combined with the 1% better R1 value in  $P4/nnc$  suggest the higher symmetry space group is correct. For Compound **II**, the string distribution was approximately 50%, indicating no preference for long range ordering. The final R1 converged at 5.74%, with similar problems between the  $F^2$  values. Since no twin law was found, no inversion twin could be applied, and 7 atoms remained NPD after refinement,  $P4/n$  was similarly ruled out for **II**. After comparison of the glide plane violating reflections and test refinements in lower symmetries, it was found that the  $P4/nnc$  model best described the diffraction data of both compounds.
